# Supplementary material for: Engineering the underlying surface to manipulate the growth of 2D perovskites for highly efficient solar cells
Source: Royal Society of Chemistry journal article supplement (doi:10.1039/c9ta03022k), 2019-01-01
Supplement: c9ta03022k1.pdf [file c9ta03022k1.pdf]

## Supporting Information

### Engineering the underlying surface to manipulate the growth of 2D perovskites for highly efficient solar cells

Shuoxun Tian<sup>a</sup>, Jiehuan Chen<sup>a</sup>, Xiaomei Lian<sup>a</sup>, Yaqin Wang<sup>a</sup>, Yingzhu Zhang<sup>a</sup>, Weitao Yang<sup>a</sup>, Gang Wu<sup>a\*</sup>, Weiming Qiu<sup>b\*</sup> and Hongzheng Chen<sup>a\*</sup>

<sup>a</sup>State Key Laboratory of Silicon Materials, MOE Key Laboratory of Macromolecular Synthesis and Functionalization, Department of Polymer Science and Engineering, Zhejiang University, Hangzhou 310027, P. R. China. E-mails: [samy@zju.edu.cn](mailto:samy@zju.edu.cn), [hzchen@zju.edu.cn](mailto:hzchen@zju.edu.cn)

<sup>b</sup>IMEC, KU Leuven, Kapeldreef 75, Heverlee B-3001, Belgium. E-mails: [weiming.qiu@imec.be](mailto:weiming.qiu@imec.be)

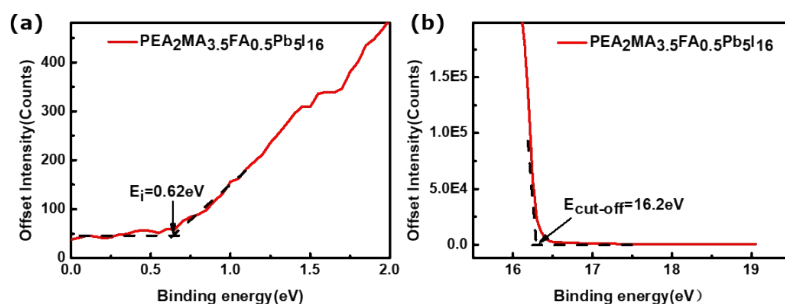

**Fig. S1** UPS in the onset ( $E_i$ ) (a) and the cutoff ( $E_{\text{cut-off}}$ ) (b) energy regions of the surface measurement for  $\text{PEA}_2\text{MA}_{3.5}\text{FA}_{0.5}\text{Pb}_5\text{I}_{16}$  perovskite films.

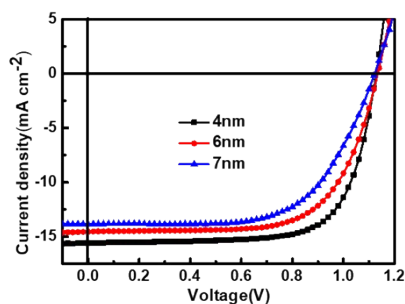

**Fig. S2**  $J$ - $V$  curves of the PVSCs with different thicknesses of PFN layer.

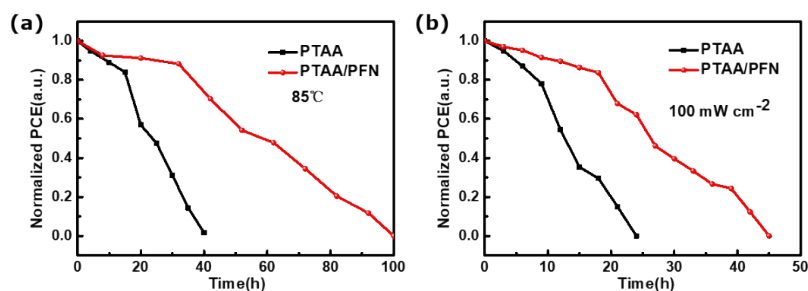

**Fig. S3** Thermal stability (a) and light stability (b) curves of the devices with and without PFN.

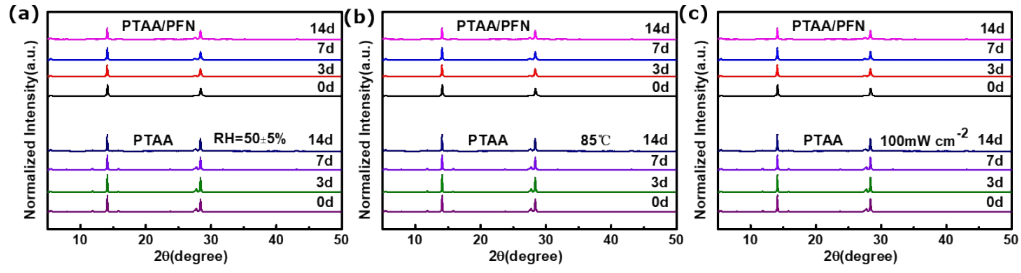

**Fig. S4** The XRD patterns of perovskite films before and after humidity (a), heat (b) and light (c) aging test.

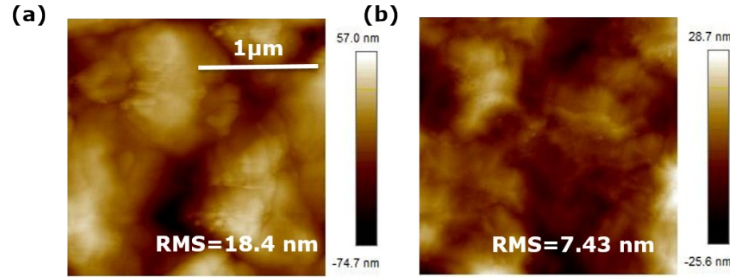

**Fig. S5** Atomic force microscopy (AFM) images of perovskite films based on PTAA (a) and PTAA/PFN (b). The root-mean-square roughness (RMS) of perovskite films on the PTAA and PTAA/PFN are 18.4 nm and 7.43 nm, respectively, indicating the film on PTAA/PFN has a smoother surface, which is agreed well with the SEM images (**Fig. 3a** and **Fig. 3b**).

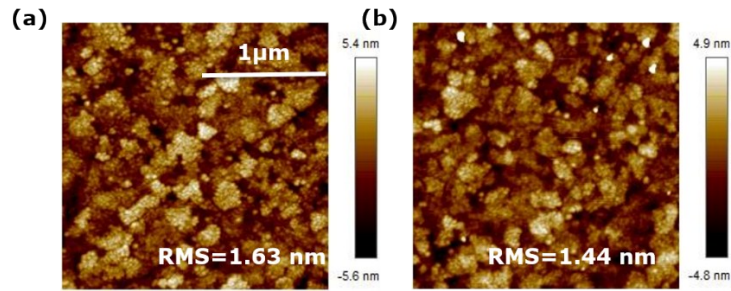

**Fig. S6** Atomic force microscopy (AFM) images of PTAA and PTAA/PFN substrates.

**Table S1** XRD pattern parameters of the perovskite films on PTAA and PTAA/PFN substrates.

| Peak     | (111)              |          | (222)              |          |
|----------|--------------------|----------|--------------------|----------|
|          | Intensity (cps)    | FWHM (°) | Intensity (cps)    | FWHM (°) |
| PTAA     | $1.75 \times 10^7$ | 0.24     | $1.38 \times 10^7$ | 0.29     |
| PTAA/PFN | $9.89 \times 10^6$ | 0.25     | $5.25 \times 10^6$ | 0.31     |
